# Supplementary material for: EGCG-Mediated Protection of Transthyretin Amyloidosis by Stabilizing Transthyretin Tetramers and Disrupting Transthyretin Aggregates
Source: MDPI journal article supplement (doi:10.3390/ijms241814146), 2023-09-15
Supplement: s1 [file s1]

# **EGCG-mediated Protection of Transthyretin Amyloidosis by Stabilizing Transthyretin Tetramer and Disrupting Transthyretin Aggregates**

**Huizhen Zou<sup>1</sup>, Shuangyan Zhou\***

<sup>1</sup> Chongqing Key Laboratory of Big Data for Bio Intelligence, Chongqing University  
of Posts and Telecommunications, Chongqing 400065, China

\* Corresponding author: zhousy@cqupt.edu.cn

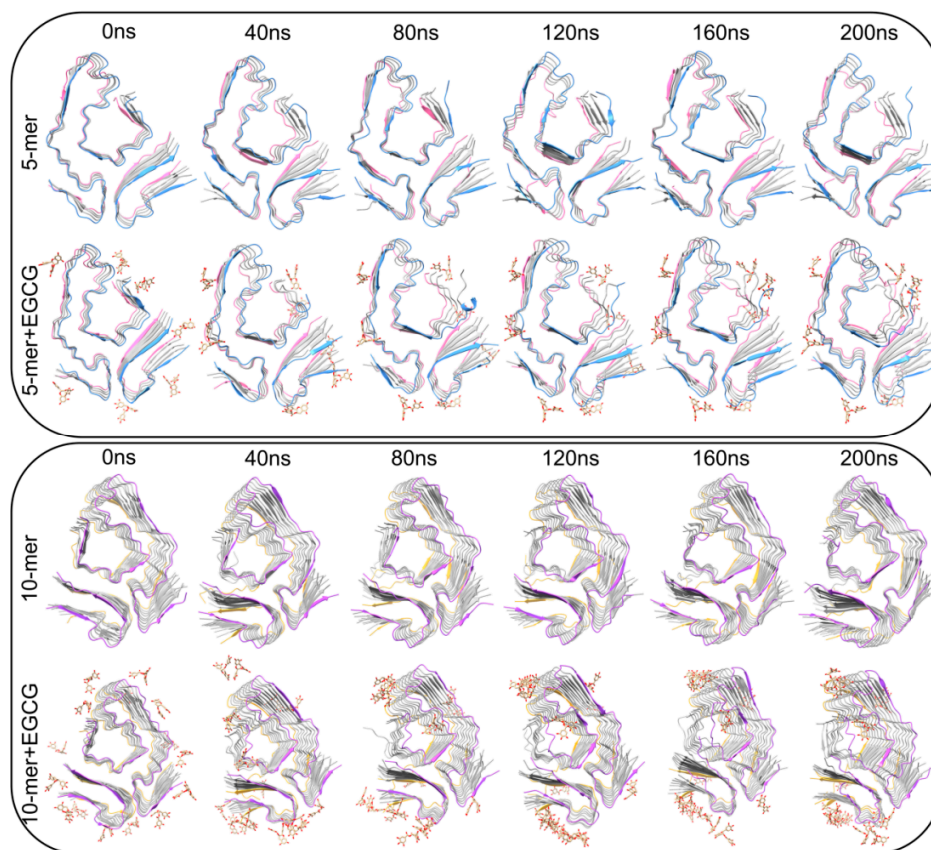

**Figure S1.** Structural presentation of TTR aggregates during simulation with an interval of 40 ns.

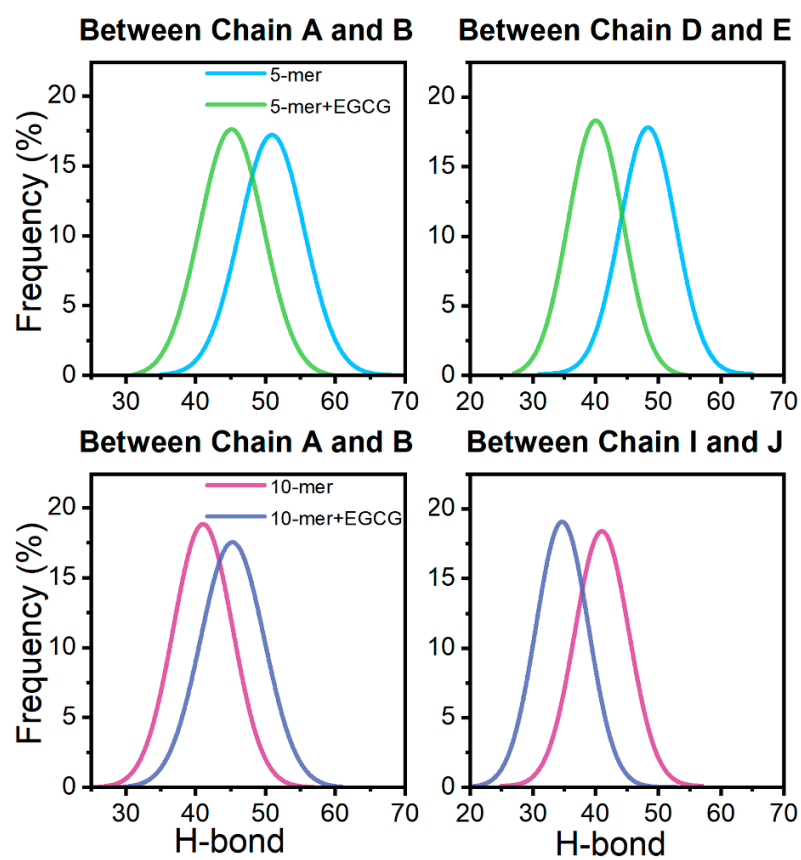

**Figure S2.** Distribution of backbone hydrogen bonding between boundary  $\beta$ -strands and adjacent  $\beta$ -strands.

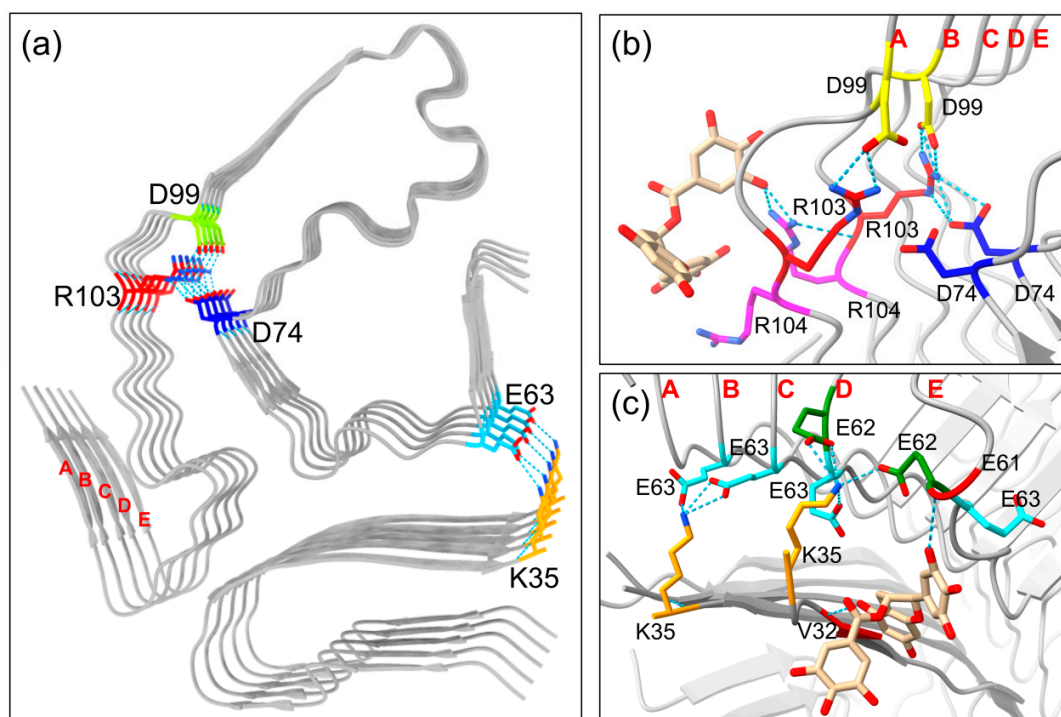

**Figure S3.** (a) Graphic of the experimental model with key interactions labeled; (b) and (c) interactions of EGCG with residues at site 1 and site 2, respectively. Letters A-D in each picture represent for the  $\beta$ -strand chain of TTR pentamer.

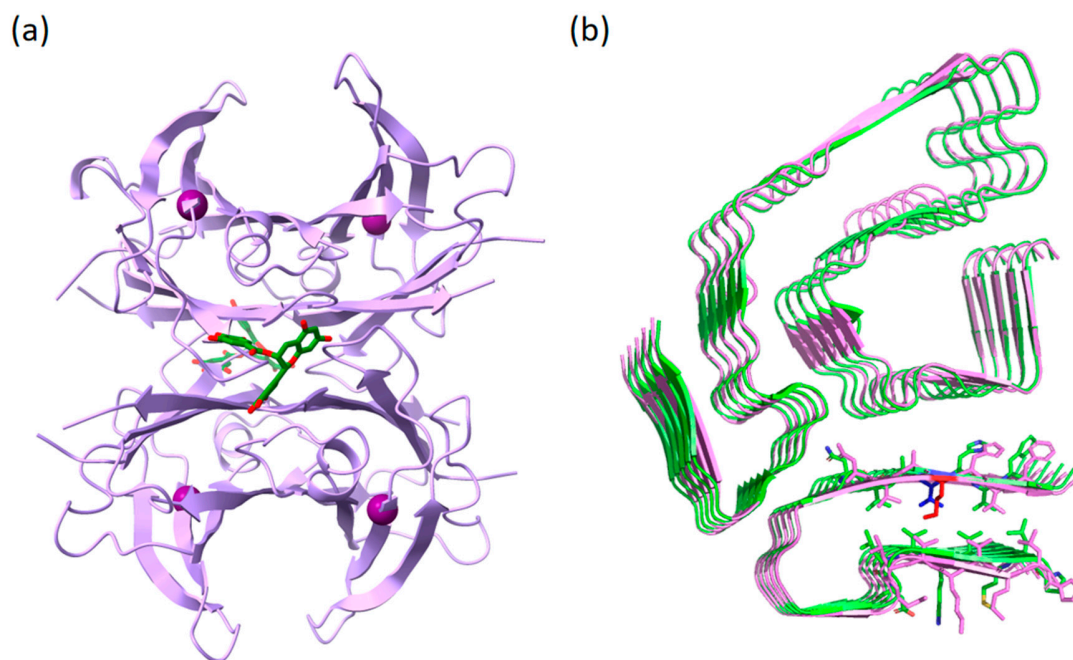

**Figure S4.** (a) Structure of V30M TTR tetramer with EGCG binding at site 1, purple balls represent for the location of residue 30 in each chain; (b) Superposition of WT and V30M TTR aggregates, pink is for V30M mutant, green is for WT, red stick indicates M30, and blue indicates V30.

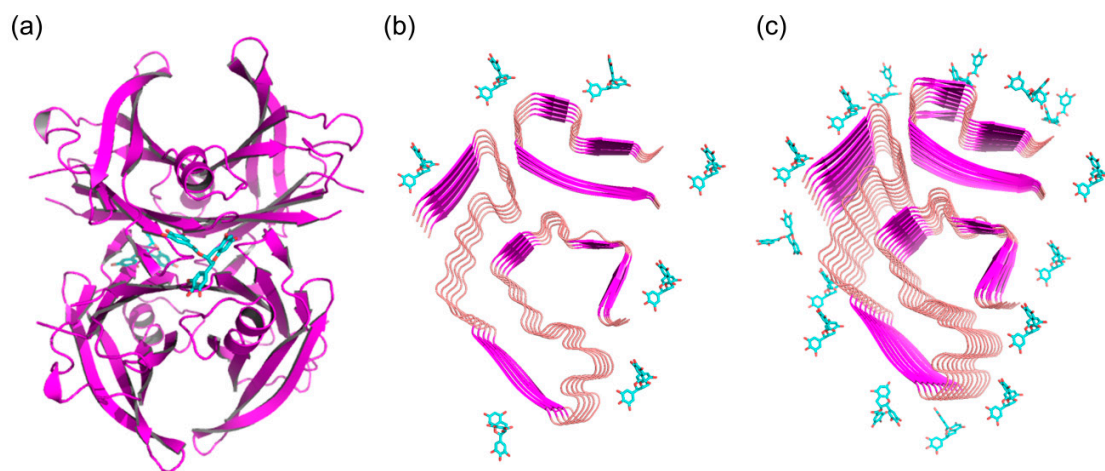

**Figure S5.** Initial structure of simulated structure. (a) Binding of EGCG to TTR tetramer at site 1; (b) initial structure of 5-mer with 7 EGCG placed randomly; (c) initial structure of 10-mer with EGCG placed randomly. TTR is depicted in purple, and EGCG is depicted in blue. And for both initial structure of 5-mer and 10-mer with EGCG, there is no hydrogen bonding interaction between EGCG and 5-mer, 10-mer.
